# Supplementary material
Source: PubMed Central journal article supplement (PMC9506987)
Supplement: NIHMS1798321-supplement-Mulia_et_al__2022_Education_Matters_Suppl_Fig_S1.pdf [file NIHMS1798321-supplement-Mulia_et_al__2022_Education_Matters_Suppl_Fig_S1.pdf]

Education Matters Supplemental Figure S1: Study Participant Ages at Survey Years (NLSY 1979 Cohort)

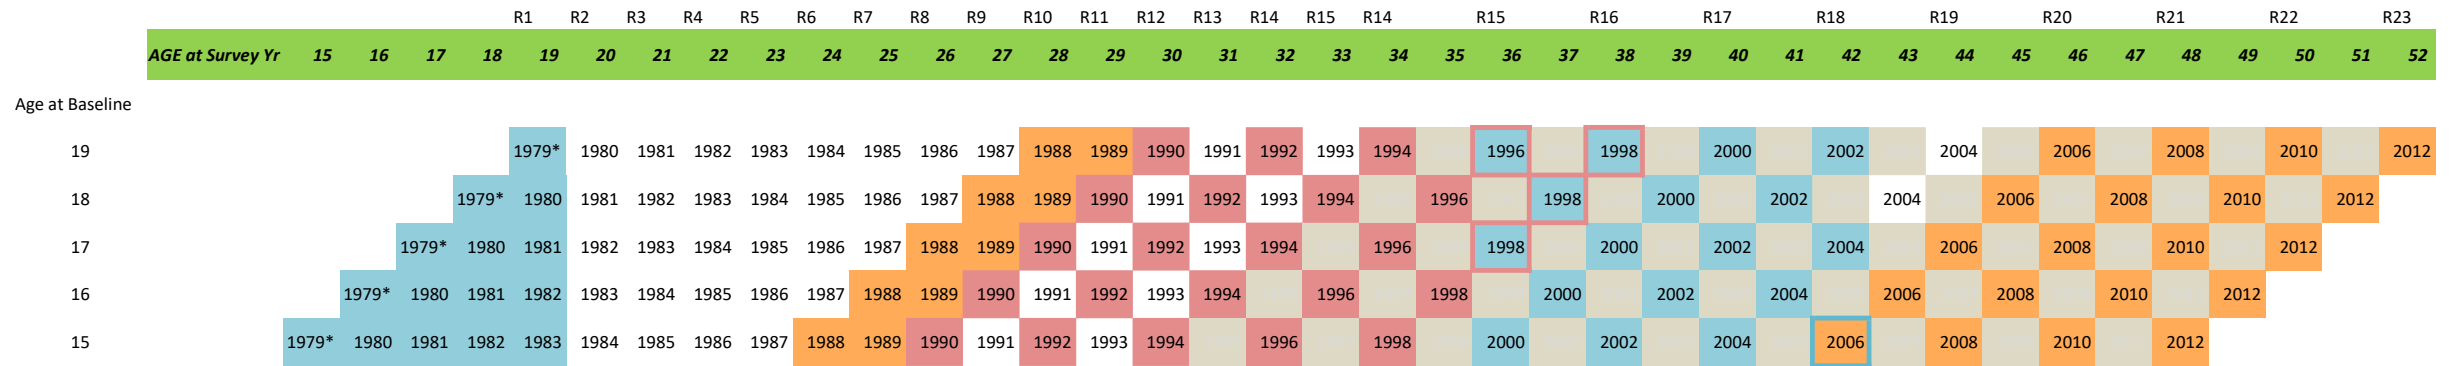

Notes & Legend \* Analytic Sample was ages 15-19 at the 1979 baseline survey. Survey years shown in cells. R= Round (R1= 1979 round)  
 Tan: No survey administered; NLSY changed to biennial follow-up interviews after 1994.  
 Orange: Heavy Drinking Frequency measured in Young Adulthood (ages 24-29) and Midlife (ages 42-52)  
 Blue: Poverty duration measured in Adolescence (ages 15-19) and in Adulthood (ages 36-42)  
 Red: Repeated unemployment measured in Adulthood (ages 26-38)  
 Cells with different colored borders indicate that the survey year provided more than one key measure (e.g., adult unemployment and poverty)
