# Supplementary material
Source: PubMed Central journal article supplement (PMC9506987)
Supplement: NIHMS1798321-supplement-Mulia_et_al__2022_Education_Matters_Suppl_Table_S1.pdf [file NIHMS1798321-supplement-Mulia_et_al__2022_Education_Matters_Suppl_Table_S1.pdf]

## Education Matters: Longitudinal Pathways to Midlife Heavy Drinking in a National Cohort of Black Americans

**Supplemental Table S1. Sample selection rules, missing values, and sample sizes**

---

| Sample inclusion                                                                                             | N     |                                                                        |
|--------------------------------------------------------------------------------------------------------------|-------|------------------------------------------------------------------------|
| Black race/ethnicity                                                                                         | 2,805 | females <i>n</i> =1421, males <i>n</i> =1384                           |
| Black and ages 15-19                                                                                         | 1,951 | females <i>n</i> =975, males <i>n</i> =976                             |
| Black and ages 15-19 with school survey data                                                                 | 1,299 | females <i>n</i> =654, males <i>n</i> =645                             |
| Sample with missing values for family history dropped in Mplus analysis (63 missing cases)                   | 1,236 | females <i>n</i> =625 (29 missing)<br>males <i>n</i> =611 (34 missing) |
| *Sample with missing values on childhood SEP or family history dropped in Mplus analysis (159 missing cases) | 1,140 | females <i>n</i> =583 (71 missing)<br>males <i>n</i> =557 (88 missing) |

---

Note: \*Sample used for final path models
